# Supplementary material
Source: PubMed Central journal article supplement (PMC9639650)

1 **Online data supplement**

2 Glucagon-like peptide 1 signaling inhibits allergen-induced lung IL-33 release and reduces group  
3 2 innate lymphoid cell (ILC2) cytokine production in vivo

4  
5 Shinji Toki,<sup>a</sup> Kasia Goleniewska,<sup>a</sup> Sara Reiss,<sup>a</sup> Jian Zhang,<sup>a</sup> Melissa H. Bloodworth,<sup>b</sup> Matthew T.  
6 Stier,<sup>b</sup> Weisong Zhou,<sup>a</sup> Dawn C. Newcomb,<sup>a,b</sup> Lorraine B. Ware,<sup>a,b</sup> Gregg D. Stanwood,<sup>c</sup> Aurelio  
7 Galli,<sup>d,g</sup> Kelli L. Boyd,<sup>b</sup> Kevin D. Niswender,<sup>d,e,f,g,\*</sup> and R. Stokes Peebles Jr.<sup>a,b,e,\*</sup>

8  
9 <sup>a</sup> Division of Allergy, Pulmonary, and Critical Care Medicine, Vanderbilt University School of  
10 Medicine, Nashville, Tennessee, USA

11 <sup>b</sup> Department of Pathology, Microbiology, and Immunology, Vanderbilt University School of  
12 Medicine, Nashville, Tennessee, USA

13 <sup>c</sup> Department of Biomedical Sciences and Center for Brain Repair, Florida State University,  
14 Tallahassee, FL, USA

15 <sup>d</sup> Department of Molecular Physiology and Biophysics, Vanderbilt University School of  
16 Medicine, Nashville, TN, USA

17 <sup>e</sup> Department of Veterans Affairs, Tennessee Valley Healthcare System, Nashville, Tennessee,  
18 USA

19 <sup>f</sup> Division of Diabetes, Endocrinology, and Metabolism, Vanderbilt University School of  
20 Medicine, Nashville, Tennessee, USA

21 <sup>g</sup> Vanderbilt Brain Institute, Vanderbilt University School of Medicine, Nashville, Tennessee,  
22 USA

23 \* These authors contributed equally to this work.

## 24 **Supplementary Materials and Methods**

### 25 **RT-PCR**

26 Human lung tissue was obtained from lungs procured from deceased organ donors whose lungs  
27 were not used for transplantation. Lungs were resected at the time of operative procurement of  
28 other organs for transplantation and transported to the laboratory inflated and cooled to  
29 4°C. Once received, samples of lung tissue were procured from grossly normal areas of the lung  
30 and preserved in *RNAlater* solution (ThermoFisher Scientific, Waltham, MA) for gene  
31 expression analysis. For this analysis, lung tissue was used only from donors with normal or near  
32 normal lung histology after review by a clinical pathologist. Mouse lungs were harvested from  
33 naïve WT BALB/c mice.

34 Total RNA was isolated by RNeasy mini kit (Qiagen, Valencia, CA) from frozen human  
35 lung tissues using *RNAlater* and fresh mouse lungs. cDNA was synthesized using SuperScript III  
36 (Invitrogen, Carlsbad, CA) according to manufacturer's instructions. 1 µl of RT product was  
37 amplified in the presence of GoTaq DNA polymerase (Pomega, Madison, WI) with QuaniTect  
38 Primer Assay. The following primers were purchased from Qiagen: human GAPDH  
39 (Hs\_GAPDH\_1\_SG), human GLP1R (Hs\_GLP1R\_1\_SG), mouse GAPDH (Mm\_Gapdh\_3\_SG),  
40 and mouse GLP1R (Mm\_Glp1r\_1\_SG). The GAPDH PCR cycling conditions were 95°C for 2  
41 min followed by 37 cycles of 94°C for 15 sec, 55°C for 30 sec, and 72°C for 30sec. The GLP1R  
42 PCR cycling conditions were 95°C for 2 min followed by 42 cycles of 94°C for 15 sec, 55°C for  
43 30 sec, and 72°C for 30sec. PCR products were separated using 2% agarose gel electrophoresis  
44 and visualized by ethidium bromide staining.

45

### 46 **Quantitative real-time PCR**

47 Total RNA was isolated from mouse lungs using the RNeasy Kit (Qiagen); and cDNA was  
48 synthesized using SuperScript III (Invitrogen). Quantitative real-time PCR analyses were  
49 performed using the StepOnePlus™ Real-Time PCR System (ThermoFisher Scientific) and  
50 iQ™ SYBR® Green Supermix (Bio-Rad) with QuaniTect Primer Assay (mouse GAPDH  
51 (Mm\_Gapdh\_3\_SG), and mouse DUOX1 (Mm\_Duox1\_1\_SG)) according to manufacturer's  
52 instructions. To determine the copy numbers of the DUOX1, the quantified concentrations of  
53 PCR amplicon was serially diluted and used as standards. Data of DUOX1 were normalized  
54 using the GAPDH expression levels in each sample.

55

#### 56 **Generation of bone marrow-derived cultured mast cell (BMCMC)**

57 BMCMCs were generated as previously described method with modifications.<sup>1</sup> Briefly, bone  
58 marrow cells were obtained by flushing the femurs of GLP-1R/mApple reporter and WT mice.  
59 The bone marrow cells were cultured at 37°C in a humidified atmosphere containing 5% CO<sub>2</sub> in  
60 RPMI-1640 medium with 10 ng/ml IL-3 (PeproTech, Rocky Hill, NJ), 10% FBS, 2 mM L-  
61 glutamine, 50 nM β-mercaptoethanol, 100 U/ml penicillin and 100 µg/ml streptomycin. Every 3  
62 or 4 days, two-thirds of floating cell suspension was transferred to new flask to remove adherent  
63 cells, and fresh culture media (one-third of total media) was added. After 3 weeks, the floating  
64 cells were used for flow cytometry to detect GLP-1R/mApple protein expression.

65

#### 66 **Cell differential counting**

67 Cytospin preparations of BAL fluid cells were performed for each sample. The slides were  
68 stained with a Richard-Allan Scientific Three step stain kit (ThermoFisher scientific) to  
69 determine cell differentials. Differential counts were based on counting 200 cells per slide.

70

71 **Histological analyses of lung sections**

72 48 h after the last challenge of *Alternaria* extract or PBS, mice were sacrificed and the lung  
73 tissue was fixed in 10% formalin solution, paraffin-embedded, cut in 5 µm sections, mounted,  
74 and stained with anti-major basic protein (MBP) antibody that was generously provided by Dr.  
75 James J. Lee (Mayo Clinic, Scottsdale, AZ, USA) to evaluate eosinophils.<sup>2</sup> Slides were  
76 examined by a pathologist blinded to experimental groups. Eosinophil score: 0= no eosinophils  
77 observed in the examined sections; 1= rare perivascular eosinophils; 2= few perivascular  
78 eosinophils and scattered eosinophils in the interstitium; 3= Moderate number eosinophils in  
79 perivascular space and in the interstitium; 4= Marked eosinophils in the perivascular space, in  
80 the interstitium and in alveolar spaces.

81 In addition, the paraffin-embedded lung tissue slices were stained with Periodic Acid  
82 Schiff's (PAS) solution to visualize mucus and mucous producing cells. Slides were scored by a  
83 pathologist blinded to the experimental groups. PAS score: 0= PAS positive cell are not observed  
84 in the examined sections; 1= Less than 10% of cells in medium and small airways are PAS  
85 positive; 2= 10-20% PAS positive cells in medium and small airways; 3= Greater than 20% cells  
86 in medium and small airways are PAS positive and hyperplasia of PAS positive cells is  
87 observed; 4= Greater than 20% PAS positive cells in medium and small airways, hyperplasia of  
88 PAS positive cells and mucous plugging of airways.

89

90 **Airway responsiveness (AR) measurement**

91 Mice were anaesthetized with pentobarbital sodium (105 mg/kg), and a tracheostomy tube was  
92 placed and the internal jugular vein was cannulated. The mice were mechanically ventilated in a

93 plethysmography chamber. Lung resistance was measured following intravenous administration  
94 of acetyl- $\beta$ -methacholine chloride (0–411  $\mu$ g/kg; SigmaAldrich St. Louis, MO) as previously  
95 described.<sup>3</sup>

96

97

98

99

100

101

102

### 103 **Supplementary References**

104 1. Kalesnikoff J, Galli SJ. Anti-inflammatory and immunosuppressive functions of mast cells. In:  
105 Cutri MC, Anegon I, editors. *Suppression and Regulation of Immune Responses, methods and*  
106 *protocols. Methods in Molecular Biology book series (MIMB, volume 677): Humana Press;*  
107 *2011. p. 207-20*

108 2. Denzler KL, Farmer SC, Crosby JR, Borchers M, Cieslewicz G, Larson KA, Cormier-Regard  
109 S, Lee NA, Lee JJ. Eosinophil Major Basic Protein-1 Does Not Contribute to Allergen-Induced  
110 Airway Pathologies in Mouse Models of Asthma. *The Journal of Immunology* 2000; 165:  
111 5509-17.

112 3. Peebles RS, Jr., Sheller JR, Johnson JE, Mitchell DB, Graham BS. Respiratory syncytial virus  
113 infection prolongs methacholine-induced airway hyperresponsiveness in ovalbumin-sensitized  
114 mice. *J Med Virol* 1999; 57: 186-192.

115

116 **Supplementary Figure Legend**

117 **FIG E1. A**, The protein level of IL-33, **B**, LDH activity, **C**, CysLTs, and **D**, PGD<sub>2</sub> in the BAL  
118 fluid from WT and IL-33 KO mice 1 h after the first *Alternaria* extract-challenge following  
119 GLP-1R agonist or vehicle treatment. n=3 for PBS-challenged groups, and n=5 for *Alternaria*  
120 extract-challenged groups. \*  $P < 0.05$  compared with vehicle-*Alternaria* extract-challenged  
121 group. **E**, The gating strategy of BMCMC. BMCMC was identified by flow cytometry as FcεRI<sup>+</sup>  
122 c-kit<sup>+</sup> CD49b (DX5)<sup>-</sup> cells. **F**, The histograms of mApple (GLP-1R) expression on cultured  
123 BMCMC from WT mice (filled gray area) or GLP-1R/mApple reporter mice (black line)

124

125 **FIG E2. A**, The gating strategy of ILC2 by cell surface staining. ILC2 were identified by flow  
126 cytometry as FSC-A/SSC-A low, lineage<sup>-</sup> CD3<sup>-</sup> CD45<sup>+</sup> CD25<sup>+</sup> CD127<sup>+</sup> cells.

127

128 **FIG E3. A**, The gating strategy of ILC2 by cell surface and intracellular staining. ILC2 were  
129 identified by flow cytometry as FSC-A/SSC-A low, lineage<sup>-</sup> CD3<sup>-</sup> CD45<sup>+</sup> CD25<sup>+</sup> ICOS<sup>+</sup> cells. **B**,  
130 Representative plots of lung ILC2 expressing IL-5 and IL-13 from mice challenged with  
131 *Alternaria* extract or PBS, and treated with GLP-1R agonist or the vehicle.

132

133 **FIG E4. A**, The gating strategy of CD4 T cell by cell surface and intracellular staining. CD4 T  
134 cell were identified by flow cytometry as FSC-A/SSC-A low, CD45<sup>+</sup> CD3<sup>+</sup> CD4<sup>+</sup> cells. **B**,

135 Representative plots of lung CD4 T cells expressing IL-5 and IL-13 from mice challenged with

136 *Alternaria* extract or PBS, and treated with GLP-1R agonist or the vehicle. **C and D**, The

137 number of IL-5<sup>+</sup> and IL-13<sup>+</sup> CD4 T cells in the lung. The results are combined with 2

138 independent experiments, and shown as mean ± S.E.M. of 4 mice in PBS-challenged groups and

139 8 mice in *Alternaria* extract-challenged groups. \*  $P < 0.05$

140

141 **FIG E5. A**, GLP-1R agonist or its vehicle was administered subcutaneously on day -2 and -1,

142 and then 4 h before HDM extract-challenge on day 0. The dose of GLP-1R agonist was 0.05

143 mg/kg on day -2, 0.1 mg/kg on day -1, and 0.2 mg/kg on day 0. The BAL fluid was harvested 1 h

144 after the HDM extract-challenge on day 0. **B**, The protein level of IL-33 and LDH activity in the

145 BAL fluid. The results are shown as mean  $\pm$  S.E.M. of 2 mice in PBS-challenged groups and 3

146 mice in HDM extract-challenged groups. **C**, WT mice were challenged with HDM extract

147 intranasally for 4 consecutive days. GLP-1R agonist or its vehicle was administered

148 subcutaneously on day -2 and -1, and then every 4 h before and after HDM extract-challenge on

149 day 0-3. The dose of GLP-1R agonist was 0.05 mg/kg on day -2, 0.1 mg/kg on day -1, and 0.2

150 mg/kg on day 0 -3. **D**, The protein expression of IL-5, IL-13, and IL-33 in the lung homogenates

151 was measured by ELISA. The results are combined with 2 independent experiments, and shown

152 as mean  $\pm$  S.E.M. of 4 mice in PBS-challenged groups and 6 mice in HDM extract-challenged

153 groups. \*  $P < 0.05$ . Veh=vehicle. PBS=phosphate buffered saline. N.D.=not detected.\*  $P < 0.05$

1 **Table E1. Antibodies for flow cytometry**

| Antigen                                        | Fluorochrome  | Clone   | Supplier                           |
|------------------------------------------------|---------------|---------|------------------------------------|
| CD3                                            | Pacific Blue  | 17A2    | BioLegend (San Diego, CA)          |
| CD4                                            | PE            | GK1.5   | BD Pharmingen™ (San Jose, CA)      |
| CD25                                           | Alexa488      | PC61    | BioLegend                          |
| CD45                                           | redFluor™ 710 | 30-F11  | TONBO Biosciences (San Diego, CA)  |
| CD49b                                          | FITC          | DX5     | BioLegend                          |
| CD117 (c-kit)                                  | APC           | 2B8     | BD Pharmingen™                     |
| CD127                                          | APC           | A7R34   | BioLegend                          |
| CD146                                          | PE-Cy7        | ME-9F1  | BioLegend                          |
| CD278 (ICOS)                                   | PE            | 7E.17G9 | eBioscience™ (Waltham, MA)         |
| CD326 (EpCAM)                                  | APC-Cy7       | G8.8    | BioLegend                          |
| FcεRI                                          | PE-Cy7        | MAR-1   | eBioscience™                       |
| IL-5                                           | APC           | TRFK5   | BD Pharmingen™                     |
| IL-13                                          | PE-Cy7        | eBio13A | eBioscience™                       |
| Lineage cell detection cocktail-biotin (mouse) | (Biotin)      |         | Miltenyi Biotech Inc. (Auburn, CA) |
| Streptoavidin-APC-Cy7                          | APC-Cy7       |         | BioLegend                          |
| DAPI                                           |               |         | BD Pharmingen™                     |
| Ghost Dye TM UV450                             | UV450         |         | TONBO Biosciences                  |
| Propidium iodide                               |               |         | BD Pharmingen™                     |



FIG E1.

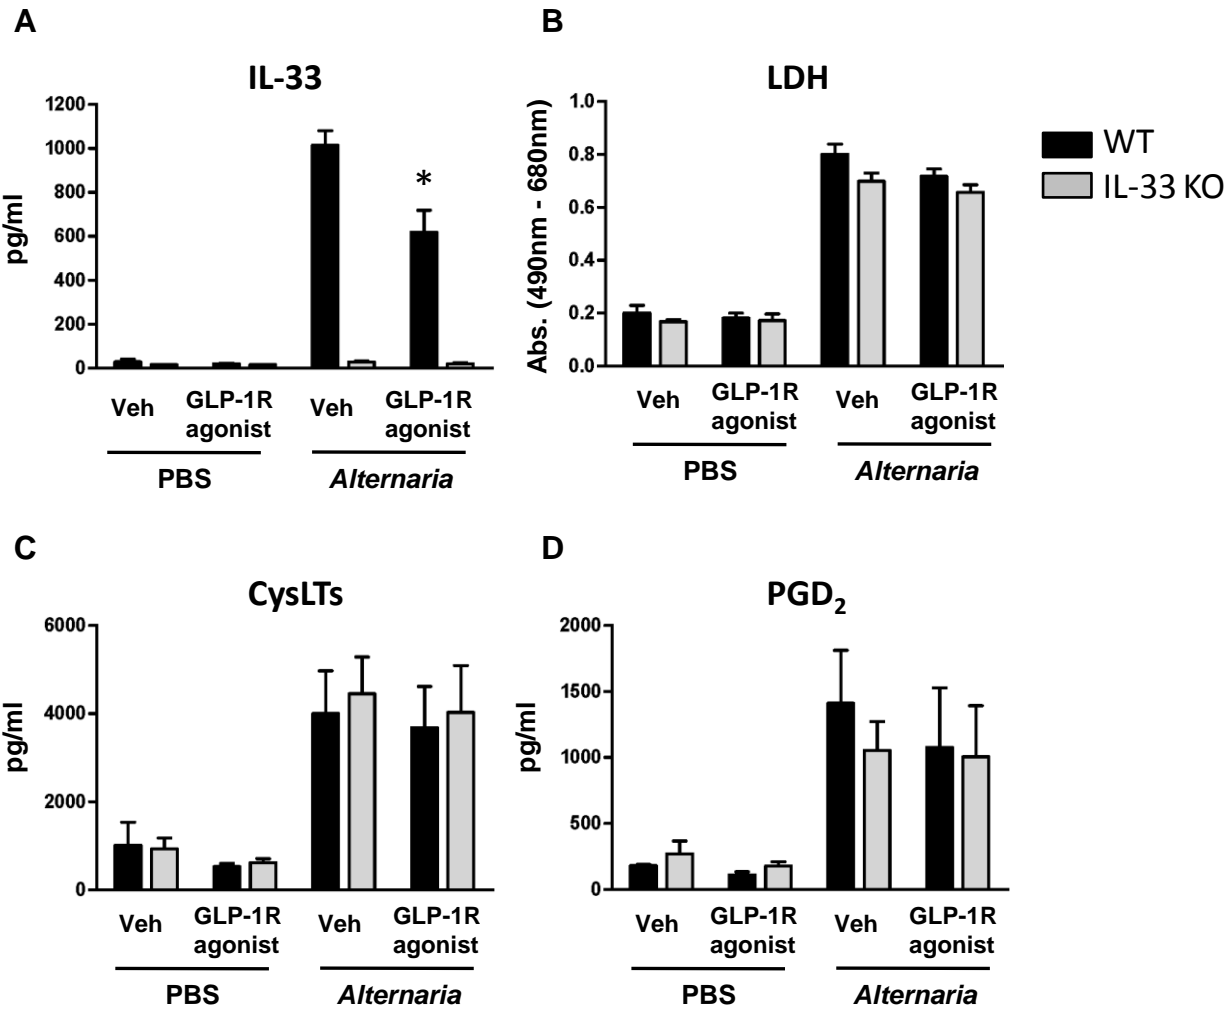

FIG E1.

Bone marrow-derived cultured mast cell gating strategy

E

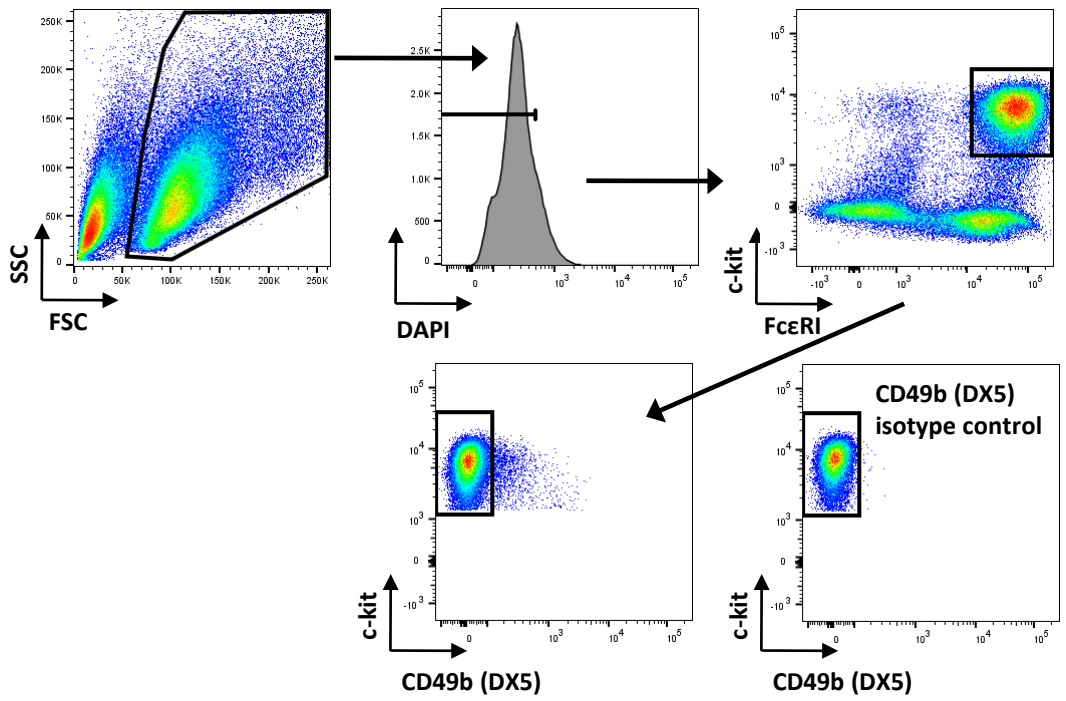

F

Bone marrow-derived cultured mast cells

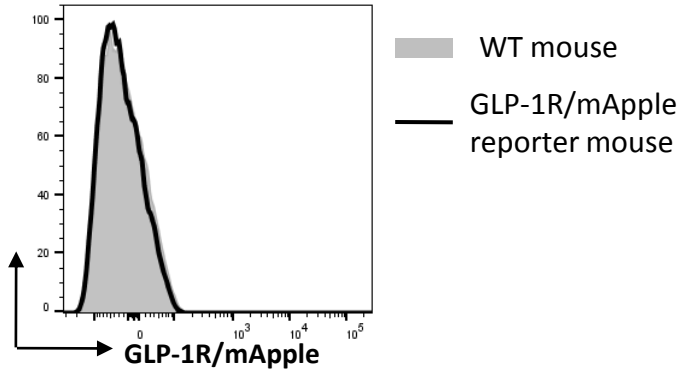

FIG E2.

ILC2 gating strategy (cell surface staining)

A

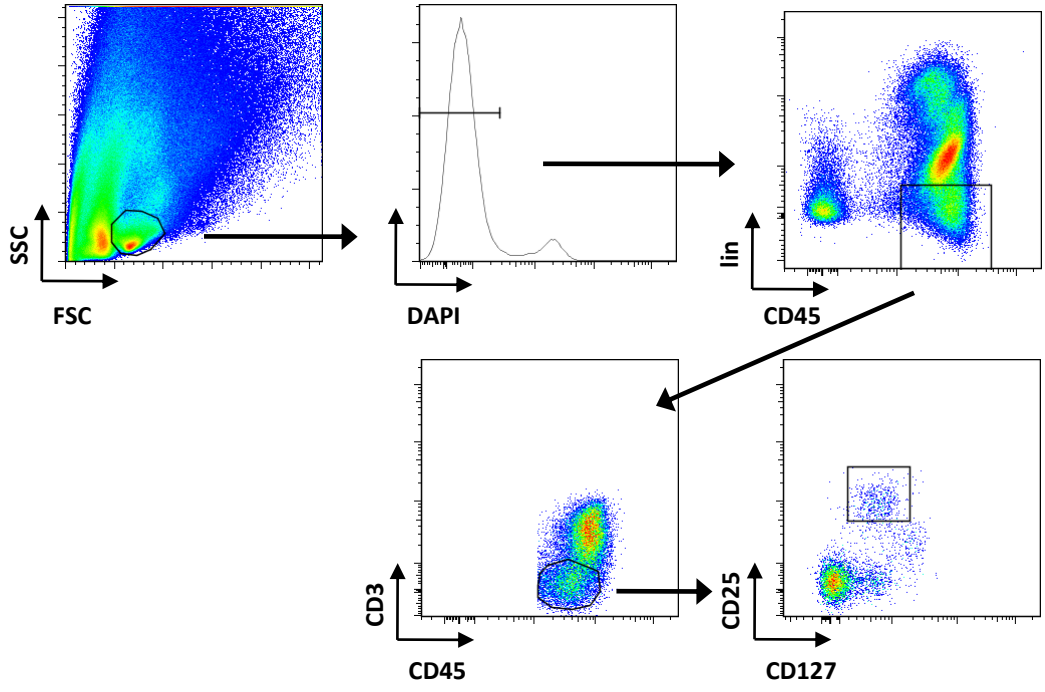

FIG E3.

**A** ILC2 gating strategy (cell surface and intracellular staining)

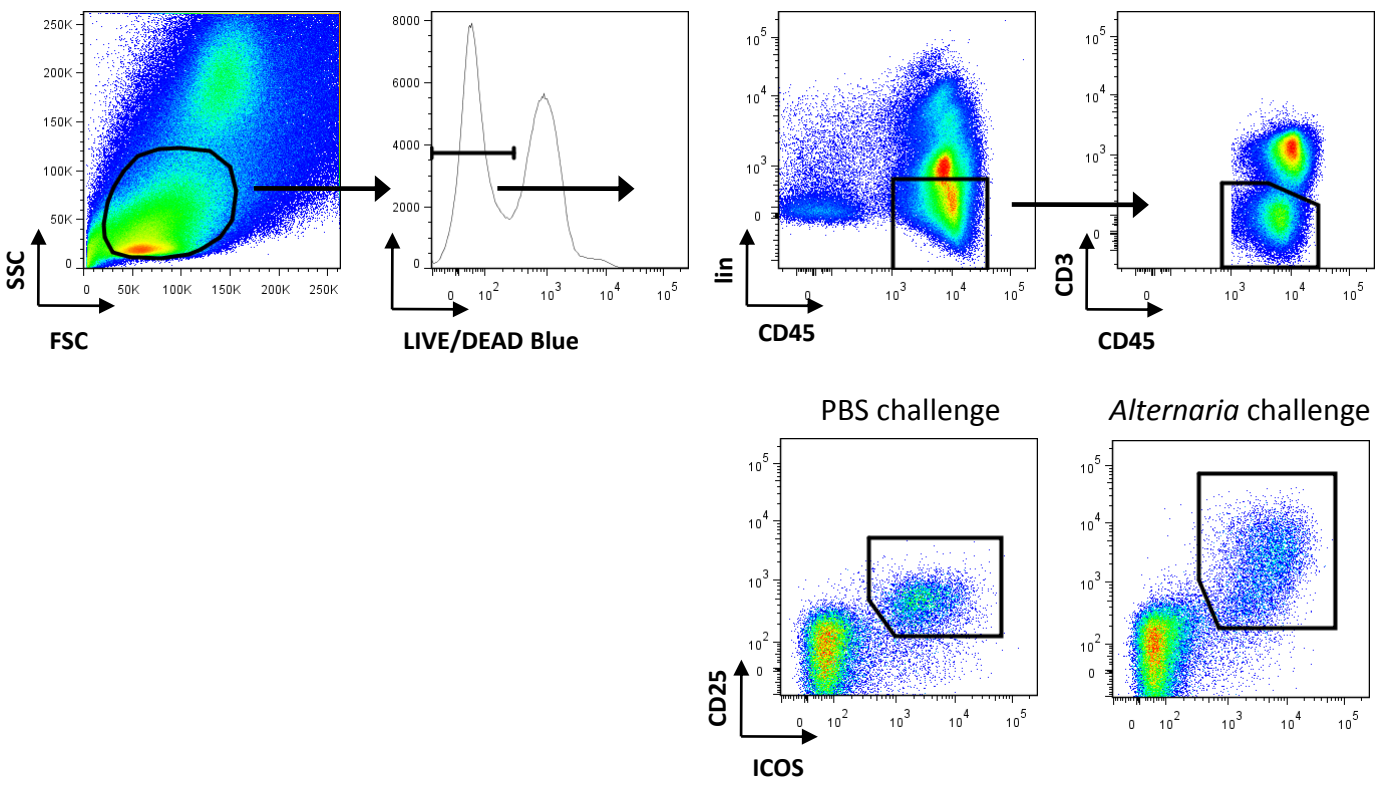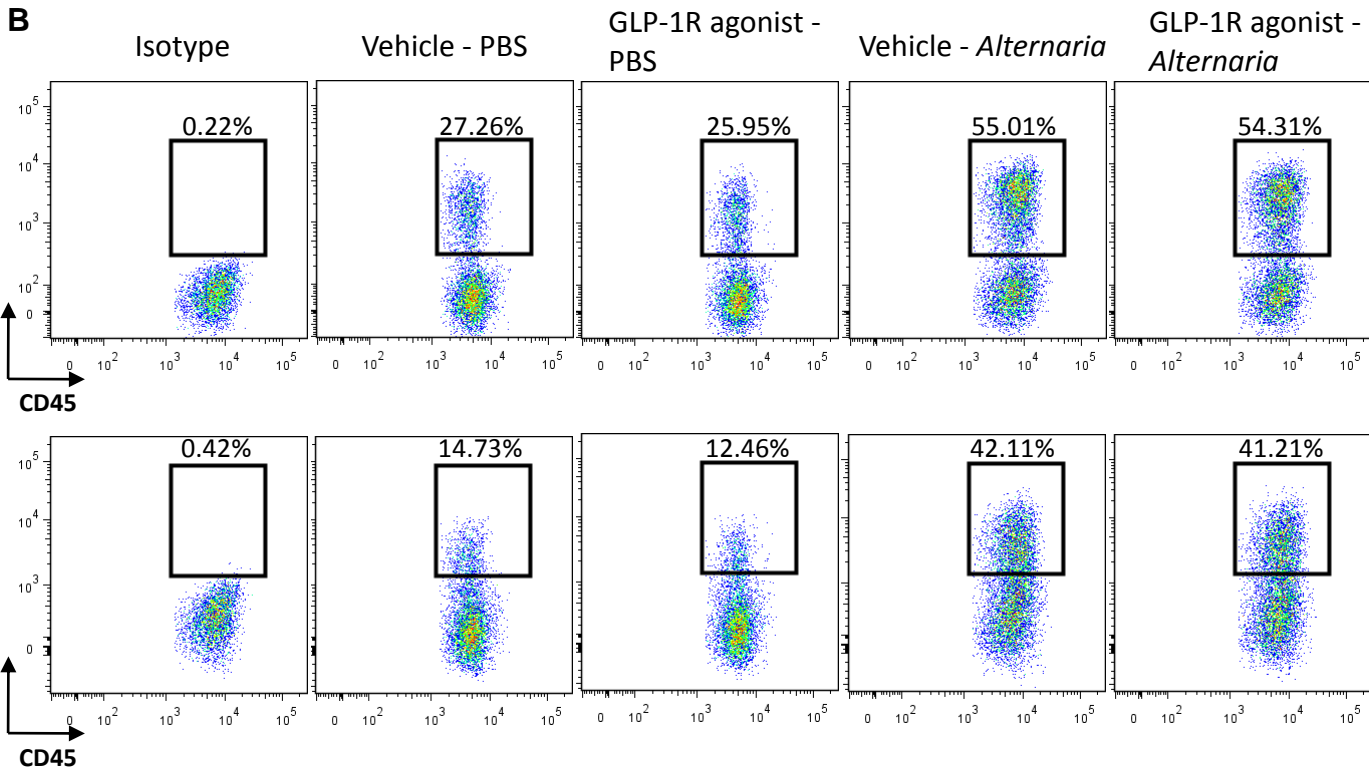

FIG E4.

**A** CD4 T cell gating strategy (cell surface and intracellular staining)

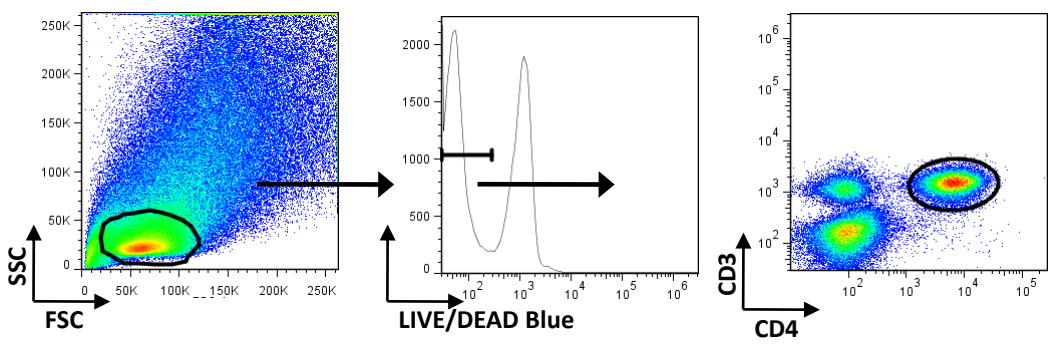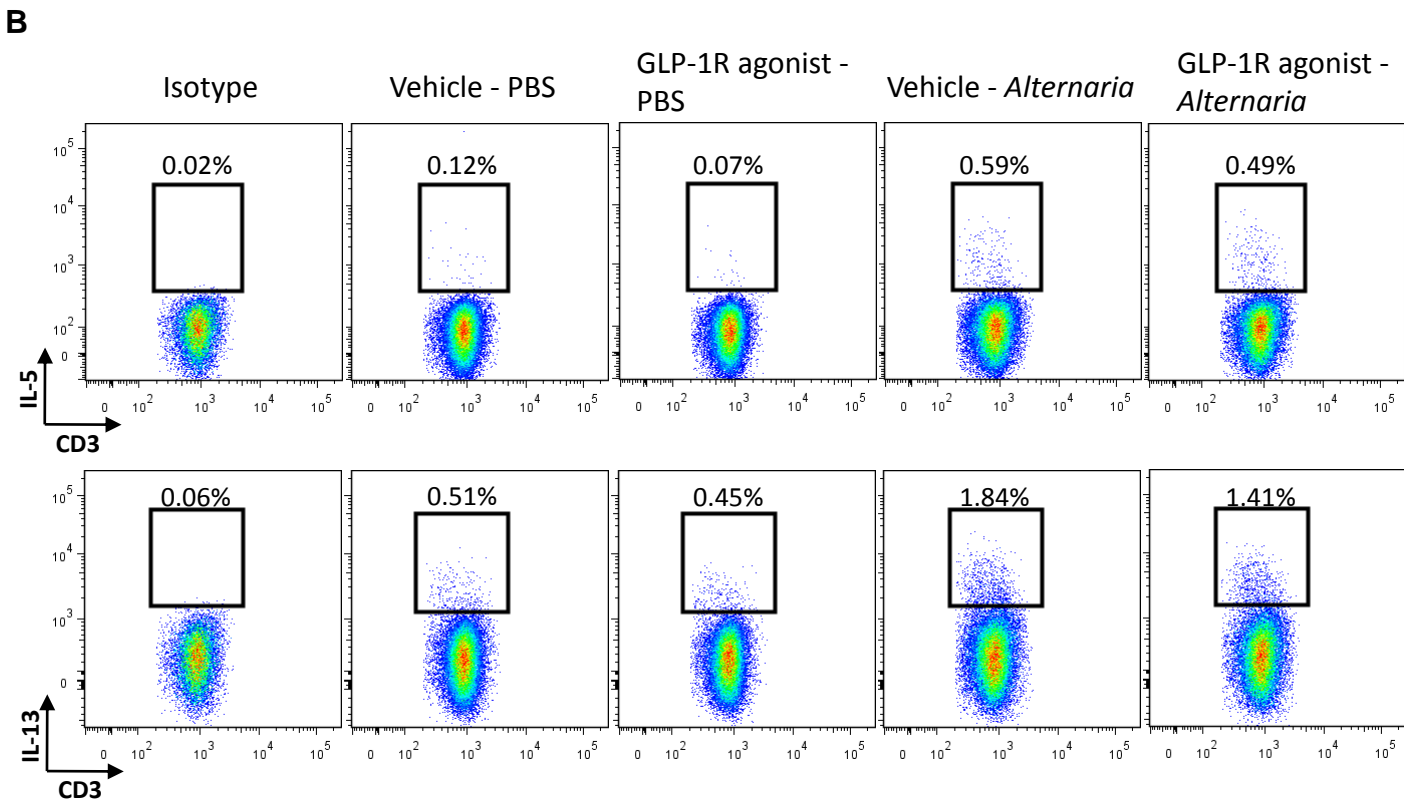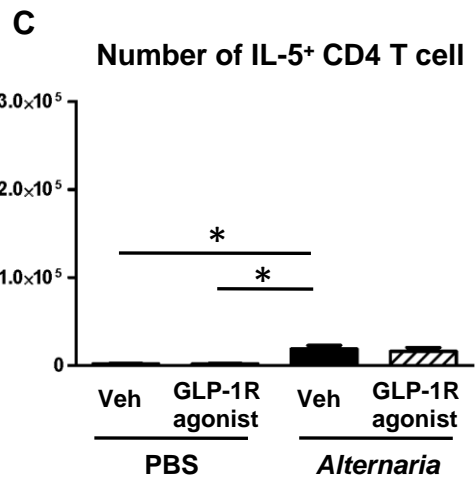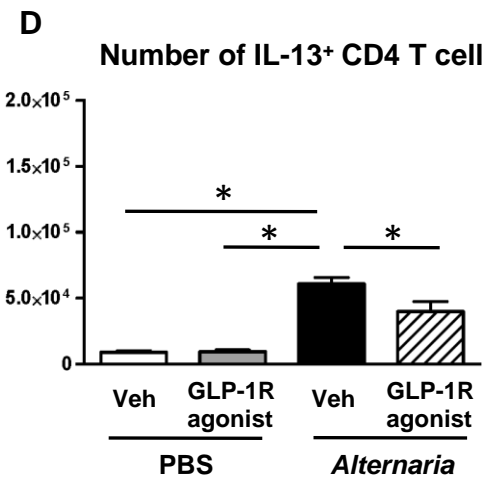

**FIG E5.**

**A**

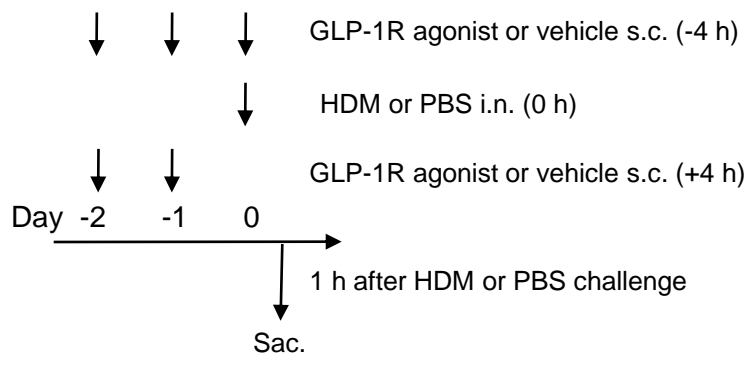

**B**

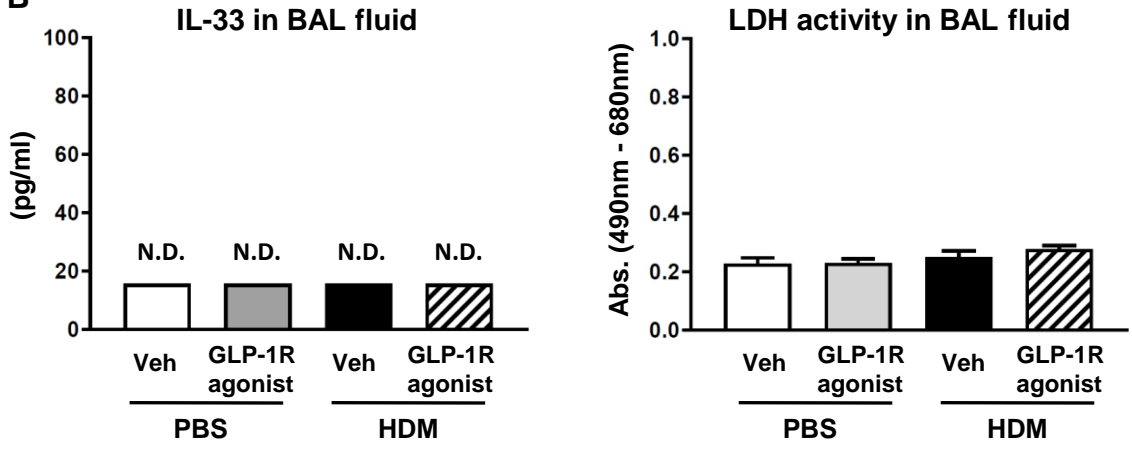

**C**

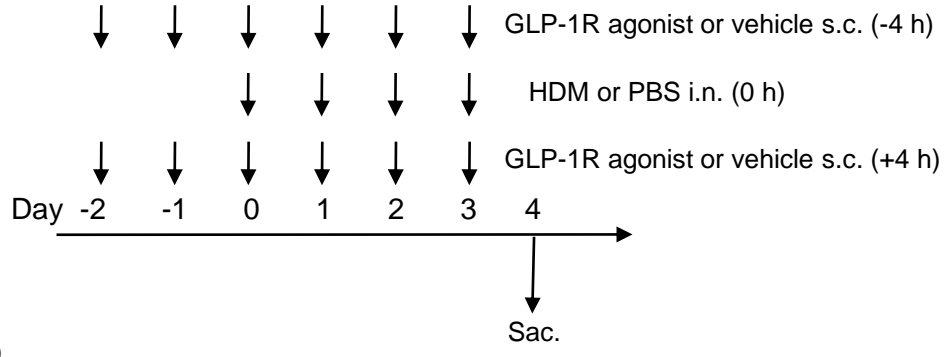

**D**

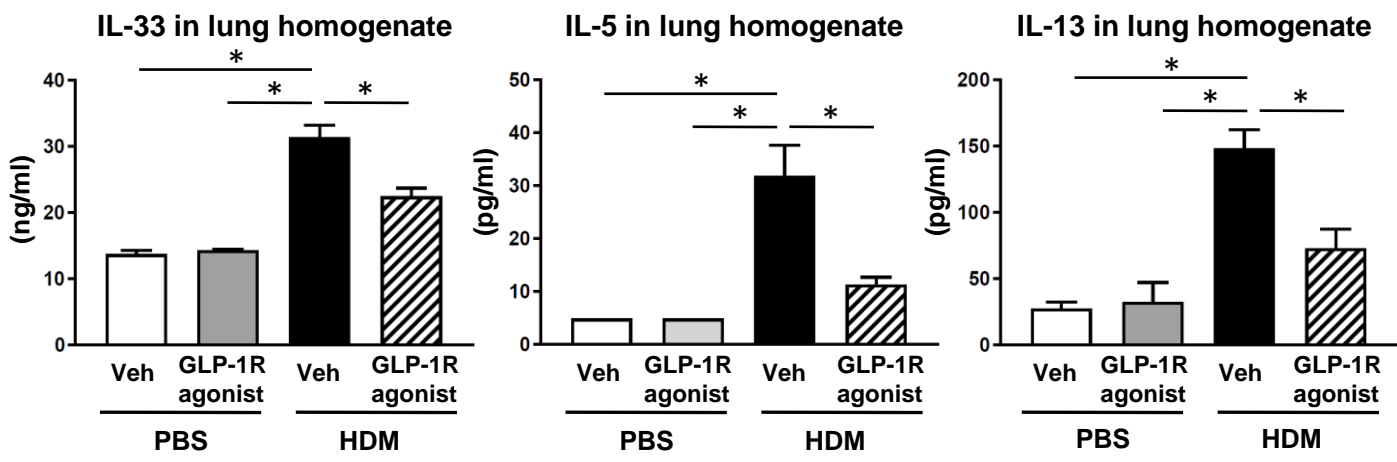

Supplement: NIHMS1510152-supplement-1.pdf [file NIHMS1510152-supplement-1.pdf]
